# Supplementary material for: Genome-wide computational assay of the Mg transporter (MGT) gene family in rice (Oryza sativa L.)
Source: Research Square preprint supplement (doi:10.21203/rs.3.rs-1747664/v1), 2022-06-22
Supplement: Supplementary file 4 [file d39055c72462b4937771f73b.docx]

**Table S.** The conserved motifs predicted in OsMGT protein sequences

| Motif no. | Sites | E-value | Amino acid sequence of motif | Width  (aa) | Specific domain/region |
| --- | --- | --- | --- | --- | --- |
| Motif 1 | 8 | 6.7e-219 | RAGVGGYSYLLEPLWWVGMITMJVGEIANFAAYAFAPAVLVTPLGALSII | 50 | [Mg_trans_NIPA](http://pfam.xfam.org/family/PF05653.14) |
| Motif 2 | 7 | 9.4e-184 | YLNKALDTFNTAVVSPIYYVMFTSLTILASAIMFKDWAGQNATQIATELC | 50 | [Mg_trans_NIPA](http://pfam.xfam.org/family/PF05653.14) |
| Motif 3 | 7 | 2.9e-140 | PRYGQTNIMVYIGICSLMGSLTVMSVKAVGIAJKLTFEGMNQLIYPQTW | 49 | [Mg_trans_NIPA](http://pfam.xfam.org/family/PF05653.14) |
| Motif 4 | 7 | 1.1e-141 | AHFILKEKLHRFGVLGCVLCVVGSTVIVLHAPQEREIDSVEEIWHLATZP | 50 | [Mg_trans_NIPA](http://pfam.xfam.org/family/PF05653.14) |
| Motif 5 | 6 | 1.3e-123 | EELEMLLEAYFVQIDGTLNKLSTLREYIDDTEDYINIQLDNKRNQLLQMG | 50 | - |
| Motif 6 | 7 | 7.8e-114 | LPFEFRALEVALEAACSSLEAQTSELEKEAYPALDELTSKISTLNLERVR | 50 | - |
| Motif 7 | 6 | 4.4e-073 | LKSRLVALSGRVQKVRDELEHLLDDDMDMAELYLTEKLAGQ | 41 | - |
| Motif 8 | 7 | 1.1e-067 | NVKGLLLAVASSAFIGASFIVKKKGLRRA | 29 | [Mg_trans_NIPA](http://pfam.xfam.org/family/PF05653.14) |
| Motif 9 | 7 | 1.0e-055 | DKHAIMRRTGLPARDLRVLDPLLSYPSSILGRERAIVVNLE | 41 | - |
| Motif 10 | 7 | 1.2e-033 | GFVTILAGTFLLHKTRDMDNG | 21 | [Mg_trans_NIPA](http://pfam.xfam.org/family/PF05653.14) |
| Motif 11 | 2 | 5.2e-017 | CDDITVADVAAPYWQRPVGPTWWCHVAAGHPAVDAWLNAARWLHPAIC | 48 | - |
| Motif 12 | 7 | 1.2e-014 | LLSTATVVIAIGILVAGIFGMNIPISLY | 28 | [CorA](http://pfam.xfam.org/family/PF01544.18) |
| Motif 13 | 4 | 8.4e-013 | DEEDIPIPLRYWQAQGFGVTAKQKEGDSLNVDVIGVTEQDY | 41 | - |
| Motif 14 | 2 | 1.1e-012 | RKYVFGEADEIELKFVNRRKQEDLKLLCIIFNQEIRRLATQVIRVKWSLH | 50 | - |
| Motif 15 | 7 | 8.4e-009 | RAIITADEVLVLNPLDPAVAPFVEELRAR | 29 | - |
