# Supplementary material for: Genome-wide computational assay of the Mg transporter (MGT) gene family in rice (Oryza sativa L.)
Source: Research Square preprint supplement (doi:10.21203/rs.3.rs-1747664/v1), 2022-06-22
Supplement: Supplementary file 5 [file 3de62c882a6b4ef25c3788fb.xlsx]

## Sheet: Sheet1
Table . The promoter important cis elements engaged in various developmental and stress responsive pathways in rice
Element	ABRE	ARE	Box 4	CCAAT-box	G-box	GARE-motif	RY-element	MRE	MYB	TCA	W box	WUN-motif	TGACG-motif	TGA-element	MBS	P-box	AuxRR-core	GC-motif	LTR	TC-rich repeats	circadian
Function	abscisic acid responsiveness	essential for the anaerobic induction	light responsiveness	MYBHv1 binding site	light responsiveness	gibberellin-responsive element	involved in seed-specific regulation	MYB binding site involved in light responsiveness	stress responsive	salicylic acid responsiveness	WORKY binding site involved in drought-inducibility	wonding responsiveness	involved in the MeJA-responsiveness	auxin-responsive element	MYB binding site involved in drought-inducibility	gibberellin-responsive element	involved in auxin responsiveness	involved in anoxic specific inducibility	involved in low-temperature responsiveness	involved in defense and stress responsiveness	involved in circadian control
Os01g0873700	5			2	5		1	1	9		1		4	1				2		1	1
Os01g0882300	9	2		1	8				4		1		1			1	1	2	4
Os01g0708300	5	1	2		7				3				4	2				3	3	3
Os01g0869200	7		2	1	10	1		1	6		1		4					3
Os01g0601000	16		2	1	12	1			11	1			6
Os01g0908500	11	2	4	2	5				8	1		1	4		1				2
Os01g0664100	11	2	3	1	6	1			5			2	4	3	2			2		1
Os02g0518100	4	5	2		2		2		8	1	1		6	2		4		1
Os02g0498300	18	6	6	7	9	3	2		9	2	5	1	10		8		1	2	3	2
Os03g0742400	8	2	3		5			2		1	4		6	2		1		2	1
Os03g0684400	6	4	1		7				4				6	2		1		4	1
Os03g0137700	12			1	9		3		6		1		10		3	2			1
Os04g0373000	8	2	5		2	1		1	5	2			2			1		2	2
Os04g0501100	8	3		2	5				3		1		6	1	1
Os04g0430900	4	2		1	4				8	1	1		6
Os05g0430700	15	1			6				2	1	1		3		1		1	1	4
Os05t0424800	6	3	3	2	5				13	2	1	2	7		1	1				2
Os05g0513400	4	1			2	2			5	1		1	4	2
Os06g0715700	4	1	2		5			1	8		1			1	1	1		1			4
Os06g0650800	4		1		2				6	1	1				2
Os10g0545000	1	4	2		1				7				4					2
Os11g0197400	14	1	5		7			2	6			1	8	1		1	1	1	1
Os12g0566400	3	3		1				1	5	1			4				2	1	1
