# Supplementary material for: Genome-wide computational assay of the Mg transporter (MGT) gene family in rice (Oryza sativa L.)
Source: Research Square preprint supplement (doi:10.21203/rs.3.rs-1747664/v1), 2022-06-22
Supplement: Supplementary file 6 [file 990e29b9b78559dbf0832254.xlsx]

## Sheet: Sheet1
Table 1. List of the identified OsMGT genes in the rice genome
Gene ID	Locus ID	Chr. location	CDS (bp)	Peptide (aa)	Molecular weight (Da)	Isoelectric point	Coding exons	Protein type	Negatively charged residues (Asp + Glu)	Positively charged residues (Arg + Lys)	Instability index (II)	Aliphatic index	Grand average of hydropathicity (GRAVY)
Os01g0873700	LOC_Os01g65310	1: 37,887,626-37,890,353	1680	363	38524.3	5.94	9	NIPA	23	20	31.18	115.01	0.686
Os01g0882300	LOC_Os01g65986	1: 38,299,999-38,305,642	1821	360	38557.5	6.52	9	NIPA	24	23	32.73	111.11	0.655
Os01g0708300	LOC_Os01g51190	1: 29,423,549-29,427,813	990	292	16922.2	9.27	9	NIPA	7	12	28.96	123.9	0.703
Os01g0869200	LOC_Os01g64890	1: 37,664,233-37,667,335	1610	418	46400.9	5.06	6	MGT1, MRS	66	47	46.46	93.76	-0.246
Os01g0601000	LOC_Os01g41720	1: 23,611,048-23,615,257	1730	572	62818.9	6.1	7	CorA	68	58	45.4	97.9	-0.054
Os01g0908500	LOC_Os01g68040	1: 39,551,438-39,555,254	1500	349	48355.7	4.72	6	MRS2-3	67	43	46.87	88.56	-0.196
Os01g0664100	LOC_Os01g47460	1: 27,123,488-27,129,361	2291	558	62912.7	6.32	8	CorA	70	62	49.79	95.5	-0.263
Os02g0518100	LOC_Os02g31874	2: 18,827,027-18,831,745	1891	416	46081.4	8.97	14	NIPA	25	31	36.97	93.75	0.356
Os02g0498300	LOC_Os02g29510	2: 17,527,550-17,539,443	1388	393	44093.8	9.76	9	NIPA	24	44	46.92	102.42	0.297
Os03g0742400	LOC_Os03g53110	3: 30,453,833-30,456,585	890	249	27702.5	4.98	8	MRS2-7	32	23	30.52	95.98	-0.073
Os03g0684400	LOC_Os03g48000	3: 27,287,853-27,294,356	1920	474	51891.6	6.1	13	MRS2-6	61	57	54.18	101.29	-0.145
Os03g0137700	LOC_Os03g04480	3: 2,075,322-2,077,636	1763	435	48747.4	8.45	4	MRS2-5	48	52	50.37	101.36	0.01
Os04g0373000	LOC_Os04g30450	4: 18,189,000-18,193,537	1169	286	31756.5	5.97	9	NIPA	19	15	33.88	117.9	0.747
Os04g0501100	LOC_Os04g42280	4: 25,011,878-25,015,485	1556	225	24478.2	8.88	5	MRS2-9	33	36	50.41	105.51	-0.13
Os04g0430900	LOC_Os04g35160	4: 21,368,550-21,371,720	1281	426	44577.1	4.61	6	MRS2-8	62	36	50.51	91.06	-0.088
Os05g0430700	LOC_Os05g35570	5: 21,135,258-21,138,615	1914	355	38186.9	6.06	9	NIPA	22	19	34.38	118.42	0.706
Os05t0424800	LOC_Os05g35060	5: 20,807,123-20,811,218	1971	358	38631.8	8.21	9	NIPA	23	25	37.45	117.71	0.684
Os05g0513400	LOC_Os05g43790	5: 25,458,603-25,462,078	1914	108	11065	8.03	6	NIPA	6	7	28.34	113.8	0.752
Os06g0715700	LOC_Os06g50180	6: 30,383,141-30,386,890	1465	344	36704.2	5.51	9	NIPA	21	16	29.07	120.17	0.789
Os06g0650800	LOC_Os06g44150	6: 26,635,665-26,639,720	1629	436	48472.6	5.25	5	MRS2-5	56	46	51	99.13	-0.021
Os10g0545000	LOC_Os10g39790	10: 21,298,747-21,301,704	1711	165	17671.3	11.43	3	MRS, MGT6	10	27	94.25	71.64	-0.451
Os11g0197400	LOC_Os11g09140	11: 4,866,531-4,871,520	4785	88	8505.85	11.29	3	NIPA	4	10	45.16	86.82	0.485
Os12g0566400	LOC_Os12g37880	12: 23,279,939-23,282,625	707	106	11511.6	6.39	4	CorA, MGT	9	8	34.89	115.09	0.442
