# Supplementary material for: Genome-wide computational assay of the Mg transporter (MGT) gene family in rice (Oryza sativa L.)
Source: Research Square preprint supplement (doi:10.21203/rs.3.rs-1747664/v1), 2022-06-22
Supplement: Supplementary file 7 [file 9d04bd52f5af960b470956b8.xlsx]

## Sheet: Sheet1
Table S3. List of the MGTs co-expressed genes in the rice genome
Candidate MGT gene	Co-expressed gene ID	Co-expressed gene name	Biological function	KEGG pathway
NIPA; LOC4327682 (cluster A)	LOC4348755	ubiquitin-conjugating enzyme E2 4	protein polyubiquitination	Protein ubiquitination (osa04120)
	LOC4346744	ras-related protein RABA1f	protein transport
	LOC4337973	E3 ubiquitin-protein ligase	protein ubiquitination
	LOC4348088	E3 ubiquitin-protein ligase RHB1A	ubiquitin-protein transferase activity
	LOC4352660	serine/threonine-protein kinase SAPK9-like	protein phosphorylation; intracellular signal transduction
	LOC4349946	myosin-11	organelle localization; vesicle transport along actin filament
CorA; LOC4327867 (cluster B)	LOC4339984	ABC transporter B family member 25	cellular iron ion homeostasis; ion transport; pollen development; response to lead and cadmium ions, root development; transmembrane transport	Valine, leucine and isoleucine degradation (osa00280); Fatty acid degradation (osa00071); Synthesis and degradation of ketone bodies (osa00072); Lysine degradation (osa00310)
	LOC4345622	F-box protein SKIP28	protein ubiquitination
	LOC4344770	disease resistance protein PIK6-NP-like	defense response
	LOC4326136	acetyl-CoA acetyltransferase, cytosolic 1	fatty acid beta-oxidation; isoprenoid biosynthetic process; sterol metabolic process
	LOC4349819	ABC transporter C family member 10	transmembrane transport
	LOC4338203	D-amino-acid transaminase	carboxylic acid metabolic process; tetrahydrofolate biosynthetic process
	LOC4330184	enoyl-CoA hydratase 2	fatty acid beta-oxidation
	LOC4339844	homogentisate 1,2-dioxygenase-like	transmembrane transport
	LOC4347172	aldehyde dehydrogenase family 7 member A1	proline catabolic process to glutamate; reactive oxygen species metabolic process; response to salt stress
	LOC4326266	hydroxymethylglutaryl-CoA lyase	leucine catabolic process; lipid metabolic process
	LOC4337676	isovaleryl-CoA dehydrogenase	branched-chain amino acid catabolic process; leucine catabolic process
	LOC4334698	electron transfer flavoprotein subunit alpha	chlorophyll catabolic process; leucine catabolic process
	LOC4338691	peroxisomal adenine nucleotide carrier 1	NAD transport; regulation of peroxisome size
MRS; LOC107275769 (cluster C)	LOC4328049	MDIS1-interacting receptor like kinase 1	protein autophosphorylation; protein phosphorylation	Phenylpropanoid biosynthesis (osa00940)
	LOC4342189	blue copper protein	cellular response to cold; regulation of lignin biosynthetic process; response to oomycetes; response to oxidative stress
	LOC4331438	peroxidase 5	cellular response to oxidative stress; chloroplast-nucleus signaling pathway; hydrogen peroxide catabolic process; response to reactive oxygen species
	LOC4333262	peroxidase 27	hydrogen peroxide catabolic process; response to oxidative stress
	LOC4325636	non-specific lipid-transfer protein 2	defense response to fungus, lipid transport
	LOC4339414	non-classical arabinogalactan protein 31	response to jasmonic acid
	LOC4329975	AP2-like ethylene-responsive transcription factor PLT2	ethylene-activated signaling pathway, root development
	LOC4325180	expansin-A11-like	DNA integration, plant-type cell wall organization
	LOC4342186	peroxidase 1-like	cell redox homeostasis; defense response to bacterium; response to cold
	LOC4325035	AP2-like ethylene-responsive transcription factor PLT1	ethylene-activated signaling pathway, root development
